# Supplementary material
Source: Springer Nature journal article supplement (https://www.springermedizin.de/resource/supplementary/12876_2013_1129_MOESM2_ESM.pdf/9438158)
Supplement: MOESM2 [file 9438158]

Studies on giving Protease inhibitor to acute pancreatitis patients obtained through PubMed, EMBASE, the Cochrane Library, Japana Centra Revuo Medicina, review articles, and RCTs quoted from previous published meta-analysis (n=101).

Excluded studies (n=77): ERCP study (n=36), Giving Protease inhibitor to intervention and control group (n=8), Arterial infusion study (n=6), Chronic pancreatitis study (n=5), Post operative study (n=4), HIV study (n=2), Intra-peritoneal infusion study (n=2), No use Protease inhibitor study (n=2), Peritoneal lavage study (n=2), Giving antibiotics study (n=2), Basic study (n=2), Using fresh frozen plasma study (n=1), Functional dyspepsia study (n=1), Intervention arm only (n=1), oral administration (n=1), Guideline (n=1), and Review (n=1).

RCTs retrieved for more detailed evaluation (n=24).

Exclusion studies (n=7): Giving Protease inhibitor to intervention and control group (n=2), Comment (n=2), Studies of Protease inhibitors vs. Glucagon (n=1), Editorials (n=1), and ERCP study (n=1).

Competent studies for our meta-analysis (n=17).
